# Supplementary material for: PDGFRα depletion attenuates glioblastoma stem cells features by modulation of STAT3, RB1 and multiple oncogenic signals
Source: PubMed Central journal article supplement (PMC5288168; doi:10.18632/oncotarget.10132), 2016-06-17
Supplement: oncotarget-07-53047-s001.pdf [file oncotarget-07-53047-s001.pdf]

## PDGFR $\alpha$ depletion attenuates glioblastoma stem cells features by modulation of STAT3, RB1 and multiple oncogenic signals

### SUPPLEMENTARY FIGURE

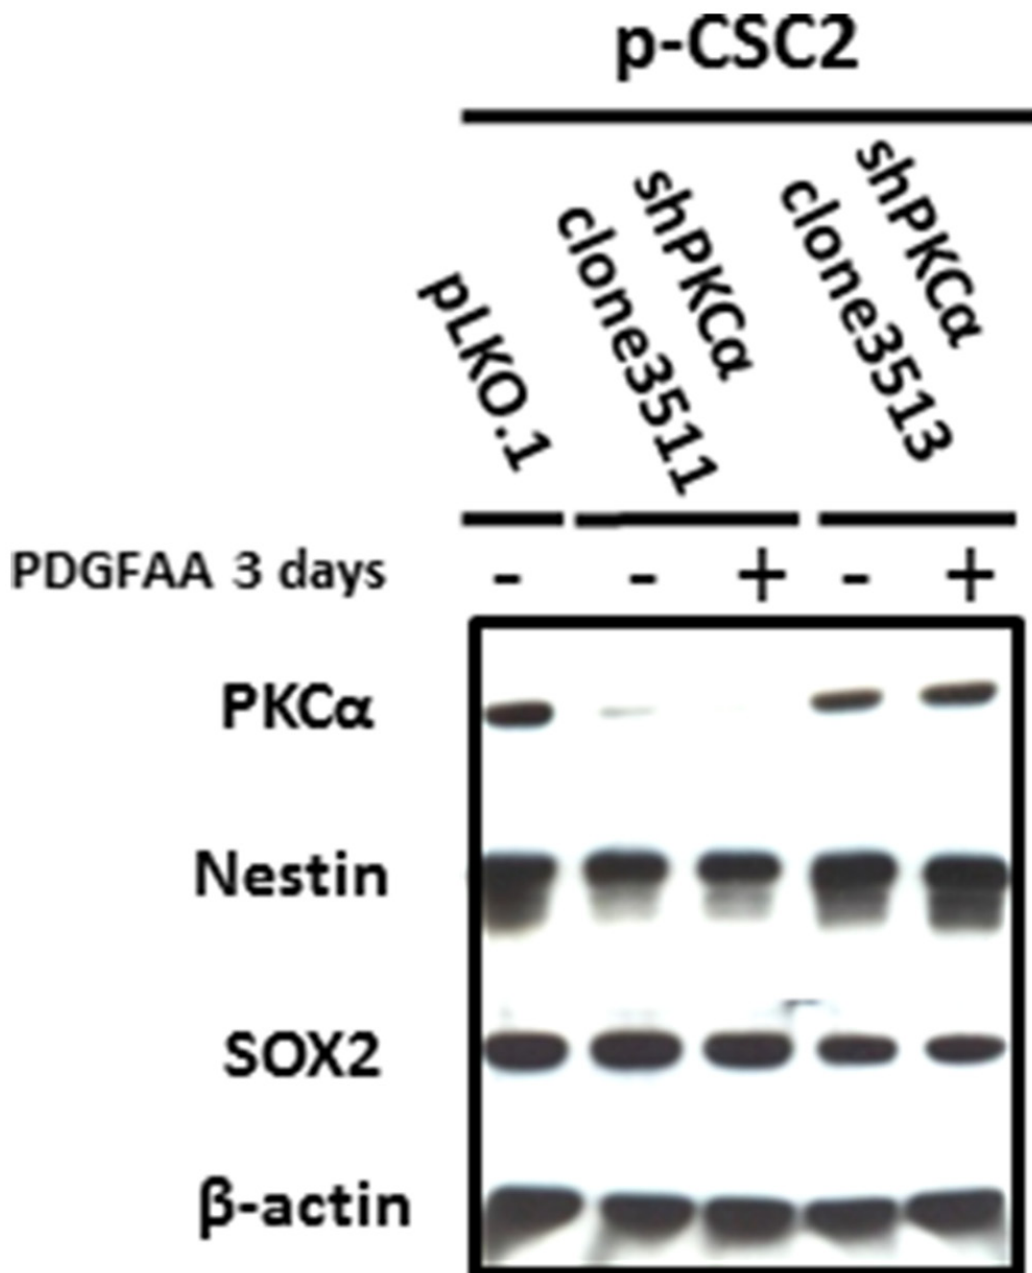

**Supplementary Figure S1: PKC $\alpha$  is not involved in the regulation of stemness in p-CSC2.** Reduction of PKC $\alpha$  protein expression in shPKC $\alpha$  cell clones does not affect expression of multipotency stem cell markers Nestin and Sox2 compared to pLKO.1 cell, after 3 days of PDGF-AA treatment.
